# Supplementary material for: Epb41l5 interacts with Iqcb1 and regulates ciliary function in zebrafish embryos
Source: Oxford University Press journal article supplement (doi:10.1242/jcs.240648), 2020-05-22
Supplement: jcs240648supp.pdf [file jcs240648supp.pdf]

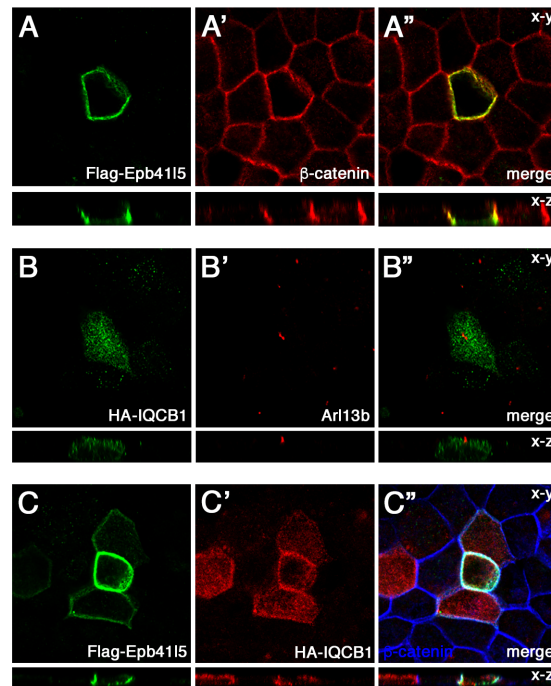

**Fig. S1. Subcellular localization of Epb4115 and IQCB1 in MDCK cells**

(A-A'') Epb4115 was localized at the basolateral membrane of MDCK cells. MDCK cells expressing exogenous Flag-Epb4115 were immunostained by anti-Flag and Adherens Junction (AJ) protein,  $\beta$ -catenin. (B-B'') IQCB1 was localized at the apical cytoplasm. MDCK cells expressing exogenous HA-IQCB1 were immunostained by anti-HA and ciliary protein Arl13b. (C-C'') Co-expression of Epb4115 and IQCB1 in MDCK cells. IQCB1 co-expression did not alter Epb4115 localization at the basolateral membrane. Epb4115 co-expression may decrease IQCB1 accumulation in the apical cytoplasm.

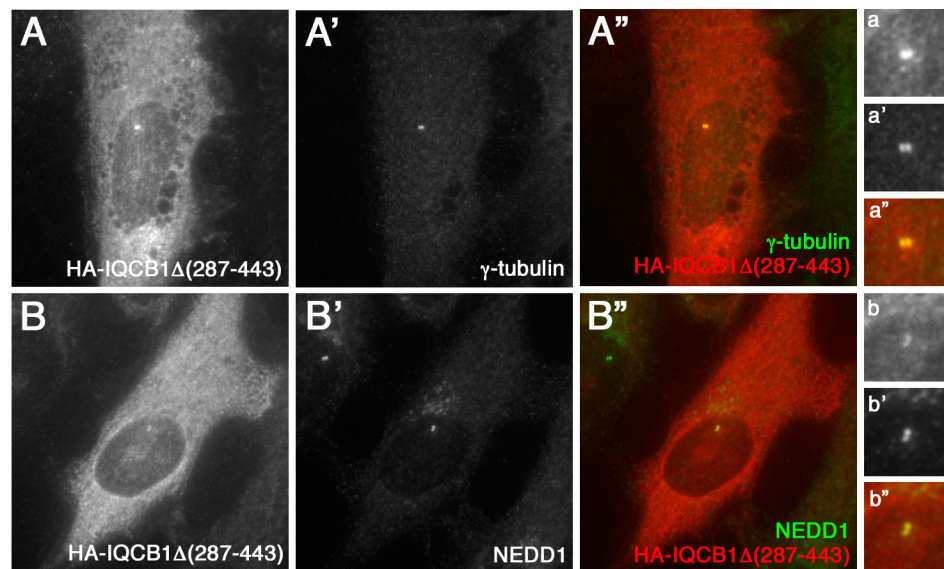

**Fig. S2. Subcellular localization of IQCB1 $\Delta$ (287-443) in hTERT-RPE1 cells**

(A-A'') IQCB1 $\Delta$ (287-443) was co-localized with endogenous  $\gamma$ -tubulin, a centrosome protein. (a-a'') Enlarged images of a portion of Fig.S2A. (B-B'') IQCB1 $\Delta$ (287-443) was co-localized with endogenous NEDD1, a centrosome protein. (b-b'') Enlarged images of a portion of Fig.S2B.

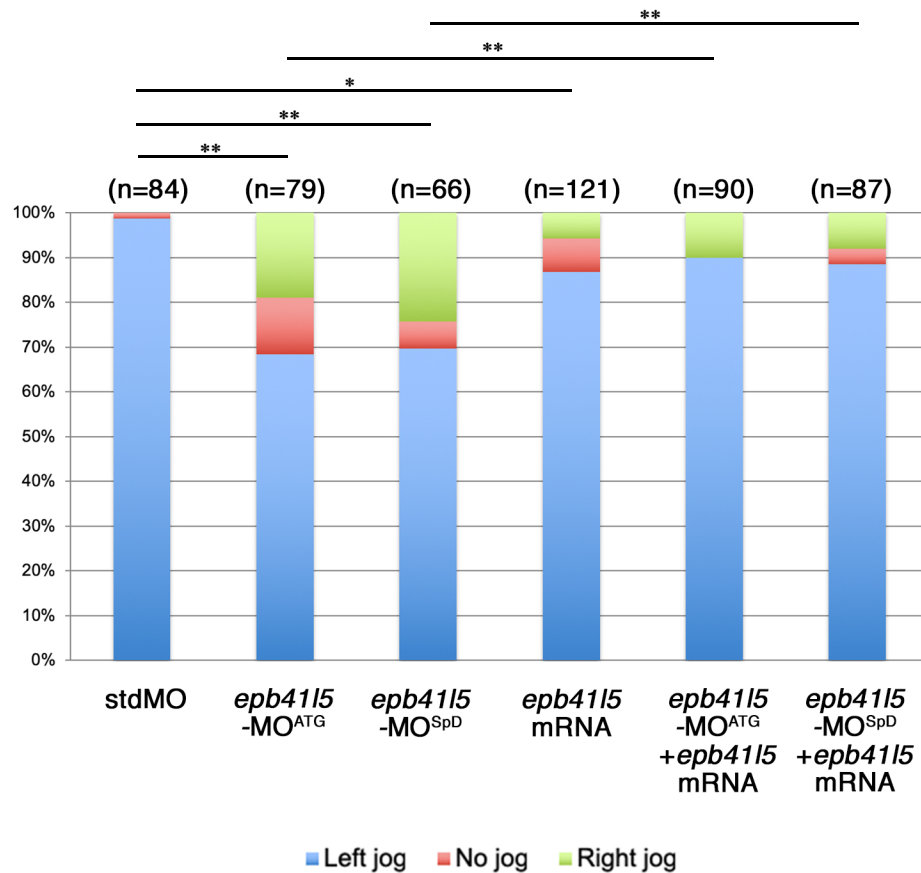

**Fig. S3. LR patterning defects in *epb41l5*-MO<sup>ATG</sup> morphants or *epb41l5*-MO<sup>SpD</sup> morphants were rescued by co-injection of *epb41l5* mRNA**

*epb41l5*-MO<sup>ATG</sup> or *epb41l5*-MO<sup>SpD</sup> morpholinos were injected with or without mRNA encoding full-length Epb41l5 at 1-2 cell stage. The direction of heart jogging at 24 hpf was scored as left jog, no jog or right jog. \*\* p<0.01, \* p<0.05, n.s. not significant.

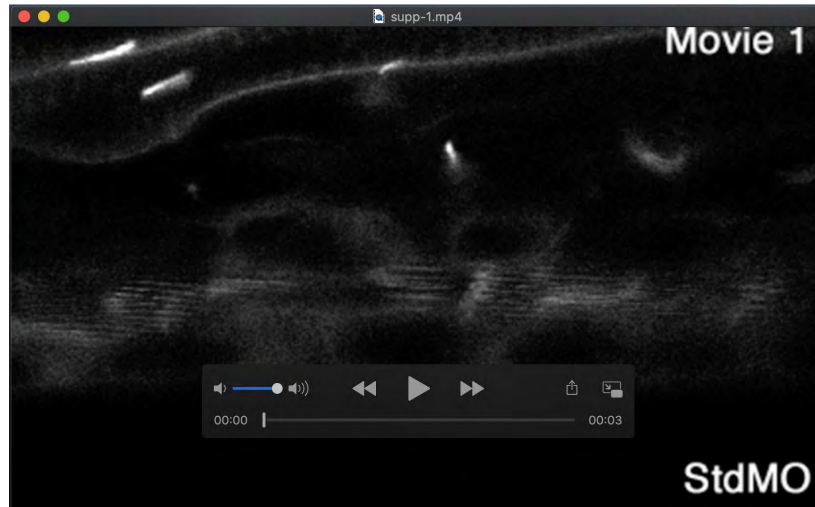

**Movie 1. Time-lapse imaging of pronephric cilia in wild-type embryos**

Pronephric cilia motility at 28-30 hpf. Images were captured at 5 second intervals for 3 min.

Pronephric cilia in control wild-type embryos were difficult to image since they moved much faster than the scanning speed of a conventional confocal microscope. n=5

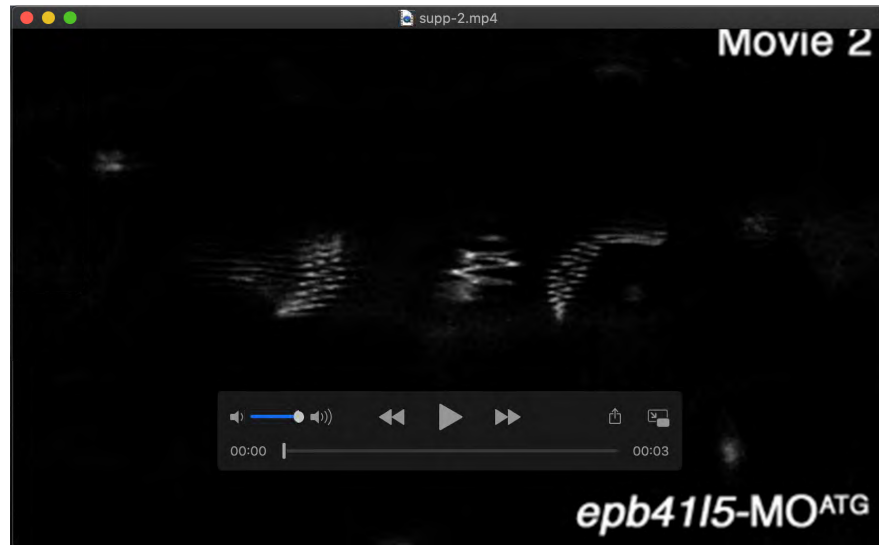

**Movie 2. Time-lapse imaging of pronephric cilia in *epb41l5*-MO<sup>ATG</sup> morphants.** Pronephric cilia motility at 28-30 hpf. Images were captured at 5 second intervals for 3 min. Pronephric cilia in *epb41l5*-MO<sup>ATG</sup> morphants were more clearly captured compared to wild-type embryos (Movie 1), suggesting that these cilia had reduced motility. n=5

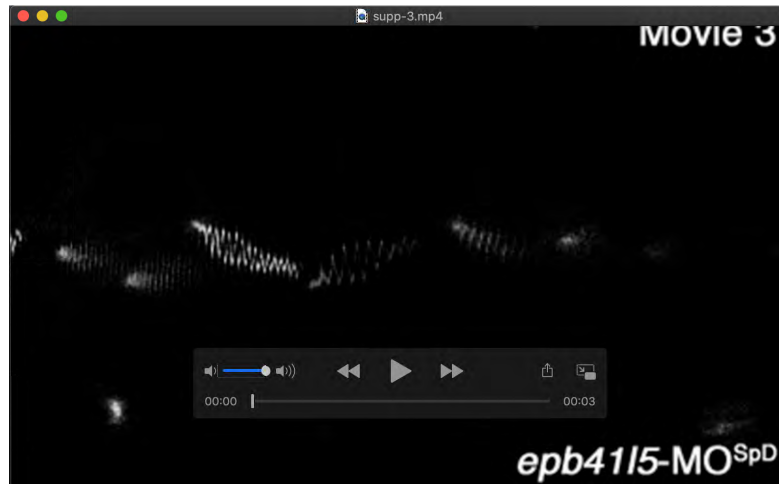

**Movie 3. Time-lapse imaging of pronephric cilia in *epb41l5*-MO<sup>SpD</sup> morphants.** Pronephric cilia motility at 28-30 hpf. Images were captured at 5 second intervals for 3 min. Pronephric cilia in *epb41l5*-MO<sup>SpD</sup> morphants were more clearly captured compared to wild-type embryos (Movie 1), suggesting that these cilia had reduced motility. n=5

Table S1

| Name                         | Sequence (5'-3')                                                 | Purposes                                                     |
|------------------------------|------------------------------------------------------------------|--------------------------------------------------------------|
| hIQCB1-F-BamHI               | GGATCCTGAAGCCAACAGGTACAGA                                        | hIQCB1 expression vector                                     |
| hIQCB1-F1-BamHI-157          | GGATCCCTGATTCTCTCTCTGGC                                          | hIQCB1 expression vector                                     |
| hIQCB1-R1-XhoI-stop157       | CTCGAGTTAAACATGGCCTCCCA                                          | hIQCB1 expression vector                                     |
| hIQCB1-R2-XhoI-stop290       | CTCGAGCTATTCTACTTCCGTATAGAC                                      | hIQCB1 expression vector                                     |
| hIQCB1-F2-BamHI-287          | GGATCCATCAGGAAGTAGAAGAGC                                         | hIQCB1 expression vector                                     |
| hIQCB1-F3-BamHI-439          | GGATCCAGAACTATTTGCTCCTTG                                         | hIQCB1 expression vector                                     |
| hIQCB1-R3-XhoI-stop443       | CTCGAGTCAAGGAGCAAATAGTTTCT                                       | hIQCB1 expression vector                                     |
| hIQCB1-R-XhoI-598            | CTCGAGCTAAGGTGGTTTGGTTC                                          | hIQCB1 expression vector                                     |
| hIQCB1Δ(287-443)-F           | TCCGACCATTGGGCTTAAAG                                             | hIQCB1 expression vector                                     |
| hIQCB1Δ(287-443)-R           | GGAGGACTCCAAGAAGCTC                                              | hIQCB1 expression vector                                     |
| hEpb41I5-shRNA#1             | GAGATGGAAGTGGCTATTTTT                                            | hEpb41I5 knockdown in human cell lines                       |
| hEpb41I5-shRNA#2             | GTTGAGATTCTGCCTATTCAG                                            | hEpb41I5 knockdown in human cell lines                       |
| zEpb41I5 splice donor gRNA 1 | GCGTAATACGACTCACTATAGGGGAGAGCAGAAAAGGGTAGCA                      | Template oligo for gRNA1 (target sequence is underlined)     |
| zEpb41I5 splice donor gRNA 2 | GCGTAATACGACTCACTATAGGGGCAGGGATGAAACAAACCTGGGTTTTAGAGCTAGAAATAGC | Template oligo for gRNA2 (target sequence is underlined)     |
| zEpb41I5 splice donor gRNA 3 | GCGTAATACGACTCACTATAGGGGCTCACAATGTCATTGCCACCGTTTTAGAGCTAGAAATAGC | Template oligo for gRNA3 (target sequence is underlined)     |
| zEpb41I5-SpD-F               | GCTCTGTTTCCCCTCTTCCT                                             | PCR primer to test gene editing                              |
| zEpb41I5-SpD-R               | AGGTTTTATTGACCACCAAGC                                            | PCR primer to test gene editing                              |
| zEpb41I5-RT-PCR-F            | GCTCTGTTTCCCCTCTTCCT                                             | RT-PCR primer                                                |
| zEpb41I5-RT-PCR-R            | GCGTAATACGACTCACTATAGGGGCTCACAATGTCATTGCCACCGTTTTAGAGCTAGAAATAGC | RT-PCR primer                                                |
| <i>epb41I5</i> -MO-ATG       | AGTTTATTCAACTCACCGGCAGGTC                                        | Translation blocking morpholino for zebrafish <i>epb41I5</i> |
| <i>epb41I5</i> -MO-SpD       | TAGCAGGGATGAAACAAACCTGGT                                         | Splicing blocking morpholino for zebrafish <i>epb41I5</i>    |
| <i>iqcb1</i> -MO             | TCAAATCTGAATACCTGAGGAGGTC                                        | Splicing blocking morpholino for zebrafish <i>iqcb1</i>      |
| <i>tp53</i> -MO              | GCGCCATTGCTTTGCAAGAATTG                                          | morpholino for <i>p53</i>                                    |

Table S2

| Name                             | Manufacture            | Catalog number | Dilution               |
|----------------------------------|------------------------|----------------|------------------------|
| <i>Primary antibodies</i>        |                        |                |                        |
| rat anti-HA (clone 3F10)         | Roche                  | 11867423001    | 1/100 (IF)             |
| mouse anti-HA (clone 16B12)      | Covance                | MMS-101P       | 1/300 (IF) 1/2000 (WB) |
| mouse anti-Flag (clone 2H8)      | Cosmo Bio              | KAL-KO602      | 1/500 (IF) 1/2000 (WB) |
| mouse anti-AcTub (clone 6-11B-1) | Sigma Aldrich          | T7451          | 1/300 (IF)             |
| rabbit anti-myc                  | Sigma Aldrich          | C3956          | 1/500 (IF) 1/2000 (WB) |
| rabbit anti-Arl13b               | Proteintech            | 17711-1-AP     | 1/500 (IF) 1/2000 (WB) |
| rabbit anti- $\gamma$ -Tubulin   | Abcam                  | ab11321        | 1/300 (IF)             |
| mouse anti-NEDD1                 | Abnova                 | H00121441-MO5  | 1/300 (IF)             |
| rabbit anti- $\beta$ -catenin    | Sigma Aldrich          | PLA0230        | 1/500 (IF)             |
| <i>Secondary antibodies</i>      |                        |                |                        |
| HRP anti-mouse IgG               | Cell Signaling         | 7074           | 1/3,000 (WB)           |
| HRP anti-rabbit IgG              | Cell Signaling         | 7076           | 1/3,000 (WB)           |
| Alexa Fluor 488 anti-rabbit IgG  | Invitrogen             | A-11034        | 1/200 (IF)             |
| Alexa Fluor 488 anti-mouse IgG   | Invitrogen             | A-11029        | 1/200 (IF)             |
| Alexa Fluor 647 anti-rabbit IgG  | Invitrogen             | A-21245        | 1/200 (IF)             |
| Cy3 anti-mouse IgG               | Jackson ImmunoResearch | 715-165-151    | 1/500 (IF)             |
| Cy3 anti-rabbit IgG              | Jackson ImmunoResearch | 711-165-152    | 1/500 (IF)             |
| Cy3 anti-rat IgG                 | Jackson ImmunoResearch | 712-165-153    | 1/500 (IF)             |
